# Supplementary material for: Micromechanical characterization of spider silk particles
Source: Royal Society of Chemistry journal article supplement (doi:10.1039/c3bm60108k), 2013-01-01
Supplement: c3bm60108k.pdf [file c3bm60108k.pdf]

# Micromechanical characterization of Spider Silk Particles

Martin P. Neubauer,<sup>‡,a</sup> Claudia Blüm,<sup>‡,b</sup> Elisa Agostini,<sup>c</sup> Julia Engert,<sup>c</sup> Thomas Scheibel<sup>\*,b</sup> and Andreas Fery<sup>\*,a</sup>

5

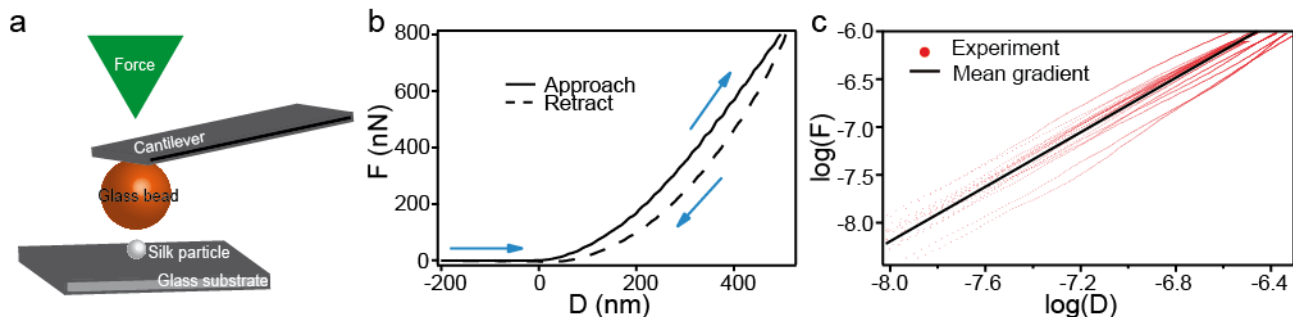

**Fig. 1 ESI** a) Schematic, lateral view of the colloidal probe setup. b) Exemplary force-deformation curve of an eADF4(C16) particle (diameter 2.7  $\mu\text{m}$ ) in water. The particle compression follows a power law with a marginal adhesion. The slight hysteresis is due to material relaxation. c) Scatter plot of 20 randomly selected logarithmic force vs. deformation curves of eADF4(C16) particles. The gradient equals  $1.42 \pm 0.10$  which is close to the predicted 1.5 from Hertz theory.

15

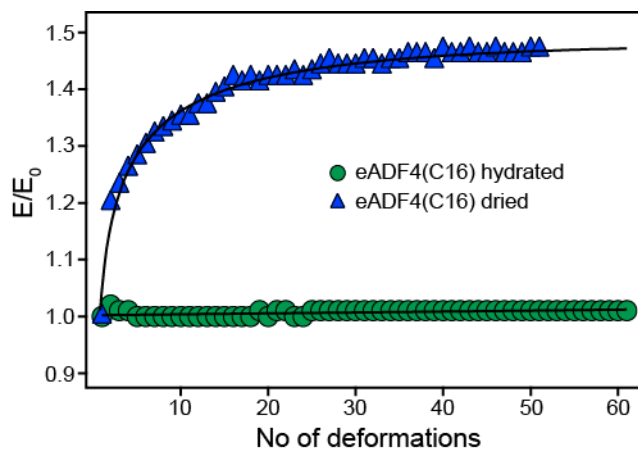

**Fig. 2 ESI** Fatigue tests of eADF4(C16) particles in dried and hydrated state. The average modulus of dried particles ( $n = 11$ ) increases, whereas swollen particles ( $n = 17$ ) show elastic behavior with constant modulus. Solid lines represent a guide to the eye.

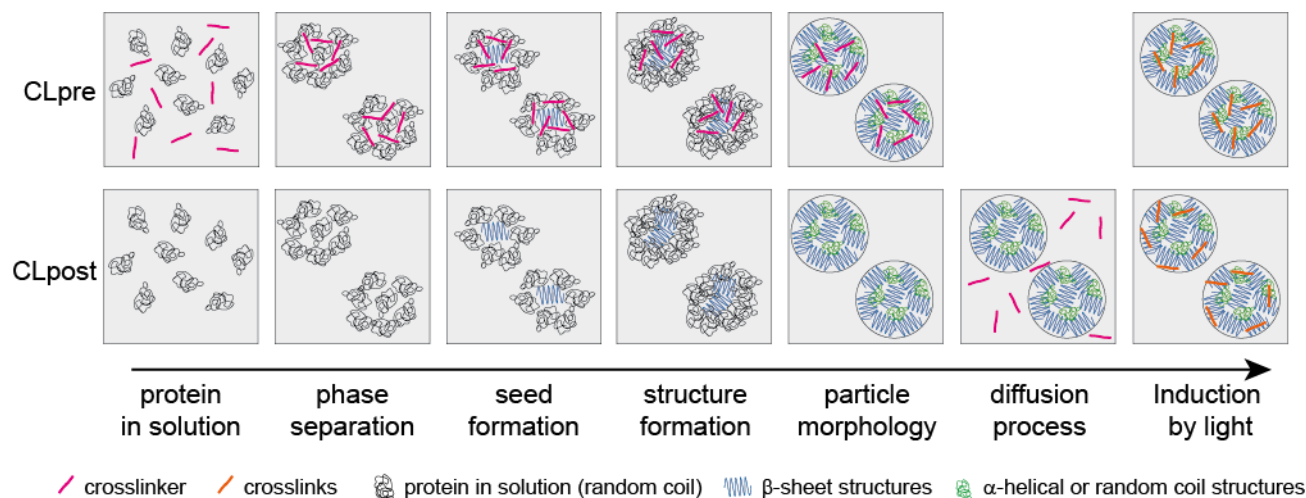

**Fig. 3 ESI** Schematic of particle-formation and the crosslinking process of eADF4 proteins. CLpre: crosslinkers added before precipitation of the particle, CLpost: addition of APS and Rubpy after formation of particles. By exposing the particles to a tungsten lamp, crosslinking is induced.

5

<sup>10</sup> **Table 1 ESI** Fit parameters<sup>a</sup> from Gaussian fits in Fig. 3a and 3b

| Sample            | Amplitude [%] | Mean [MPa]  | Width [MPa] |
|-------------------|---------------|-------------|-------------|
| eADF4(C8)         | 18.0 ± 2.9    | 2.45 ± 0.21 | 1.58 ± 0.30 |
| eADF4(C16)        | 24.6 ± 1.2    | 2.99 ± 0.04 | 1.07 ± 0.06 |
| eADF4(C32)        | 13.1 ± 1.0    | 5.42 ± 0.13 | 2.16 ± 0.19 |
| eADF4(C16) CLpre  | 12.5 ± 1.3    | 5.14 ± 0.19 | 2.22 ± 0.27 |
| eADF4(C16) CLpost | 7.26 ± 1.6    | 8.19 ± 0.69 | 3.87 ± 0.99 |

<sup>a</sup> Values ± one standard deviation.
